# Supplementary material
Source: PubMed Central journal article supplement (PMC4340255)

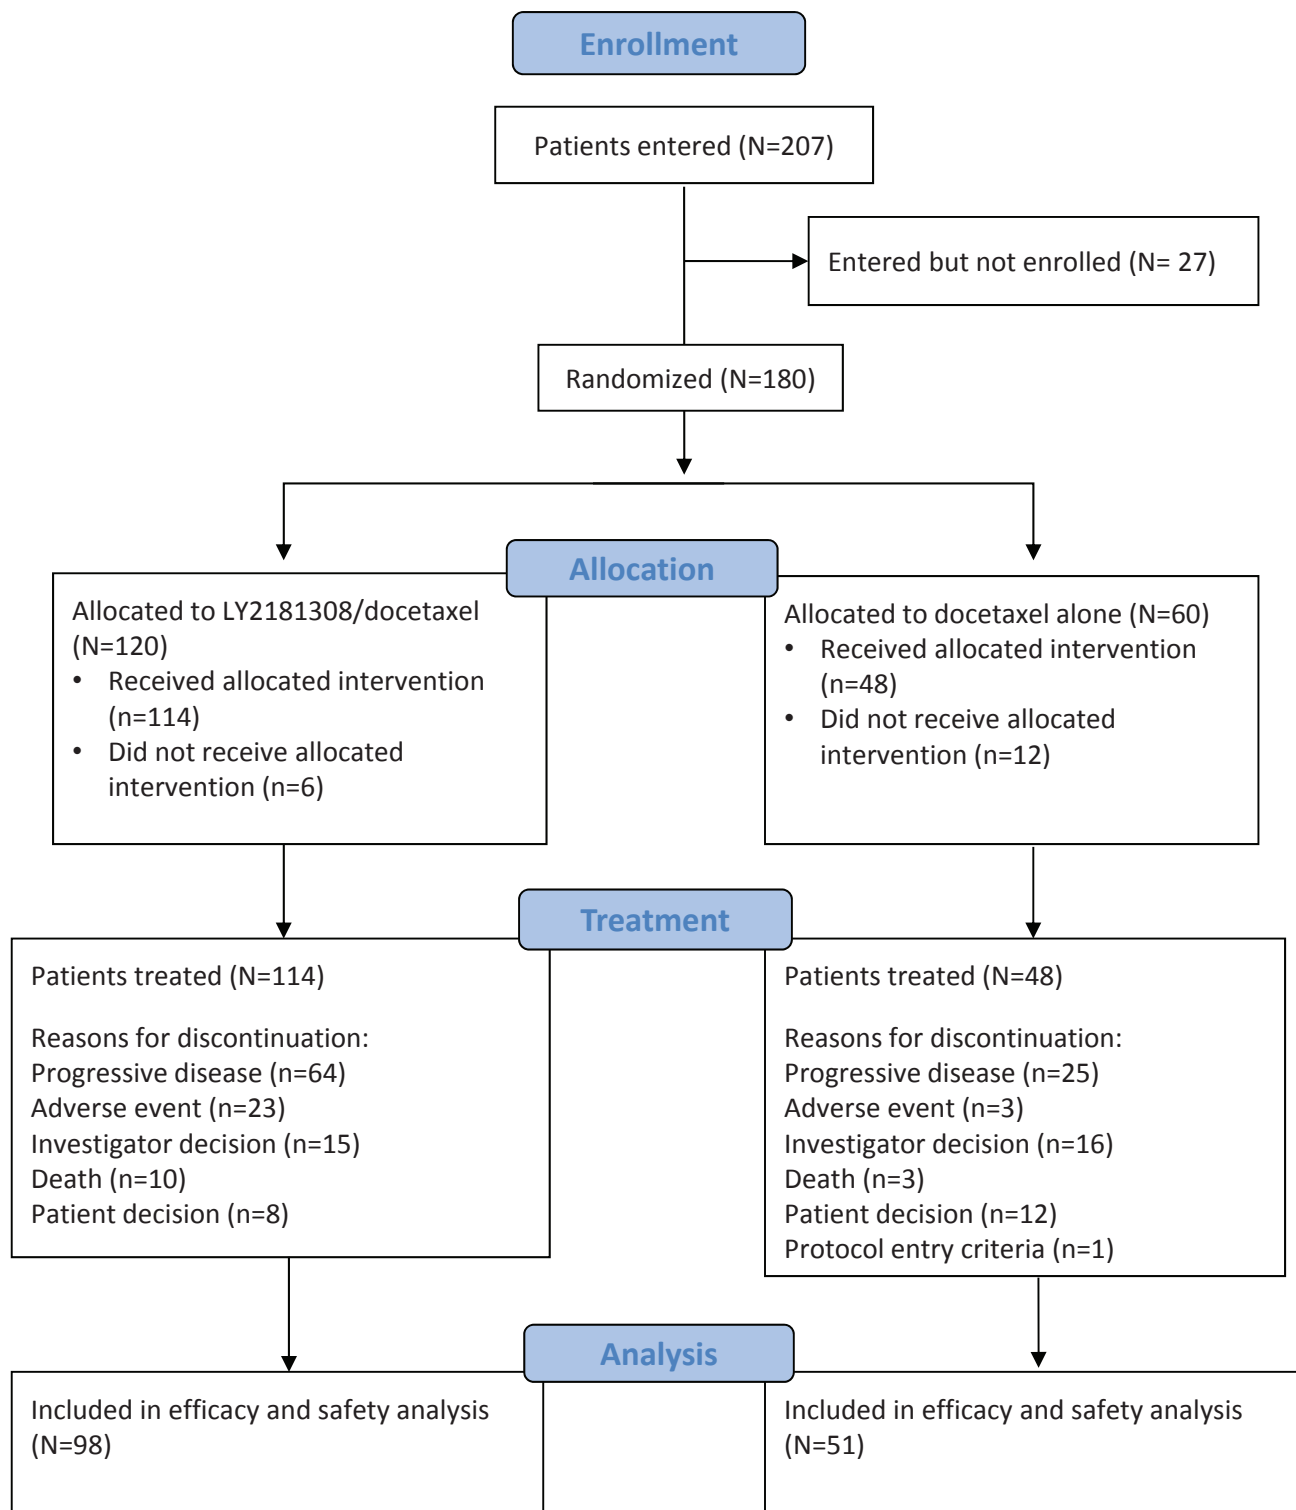

Supplement: NIHMS652994-supplement-Sup2.pdf [file NIHMS652994-supplement-Sup2.pdf]

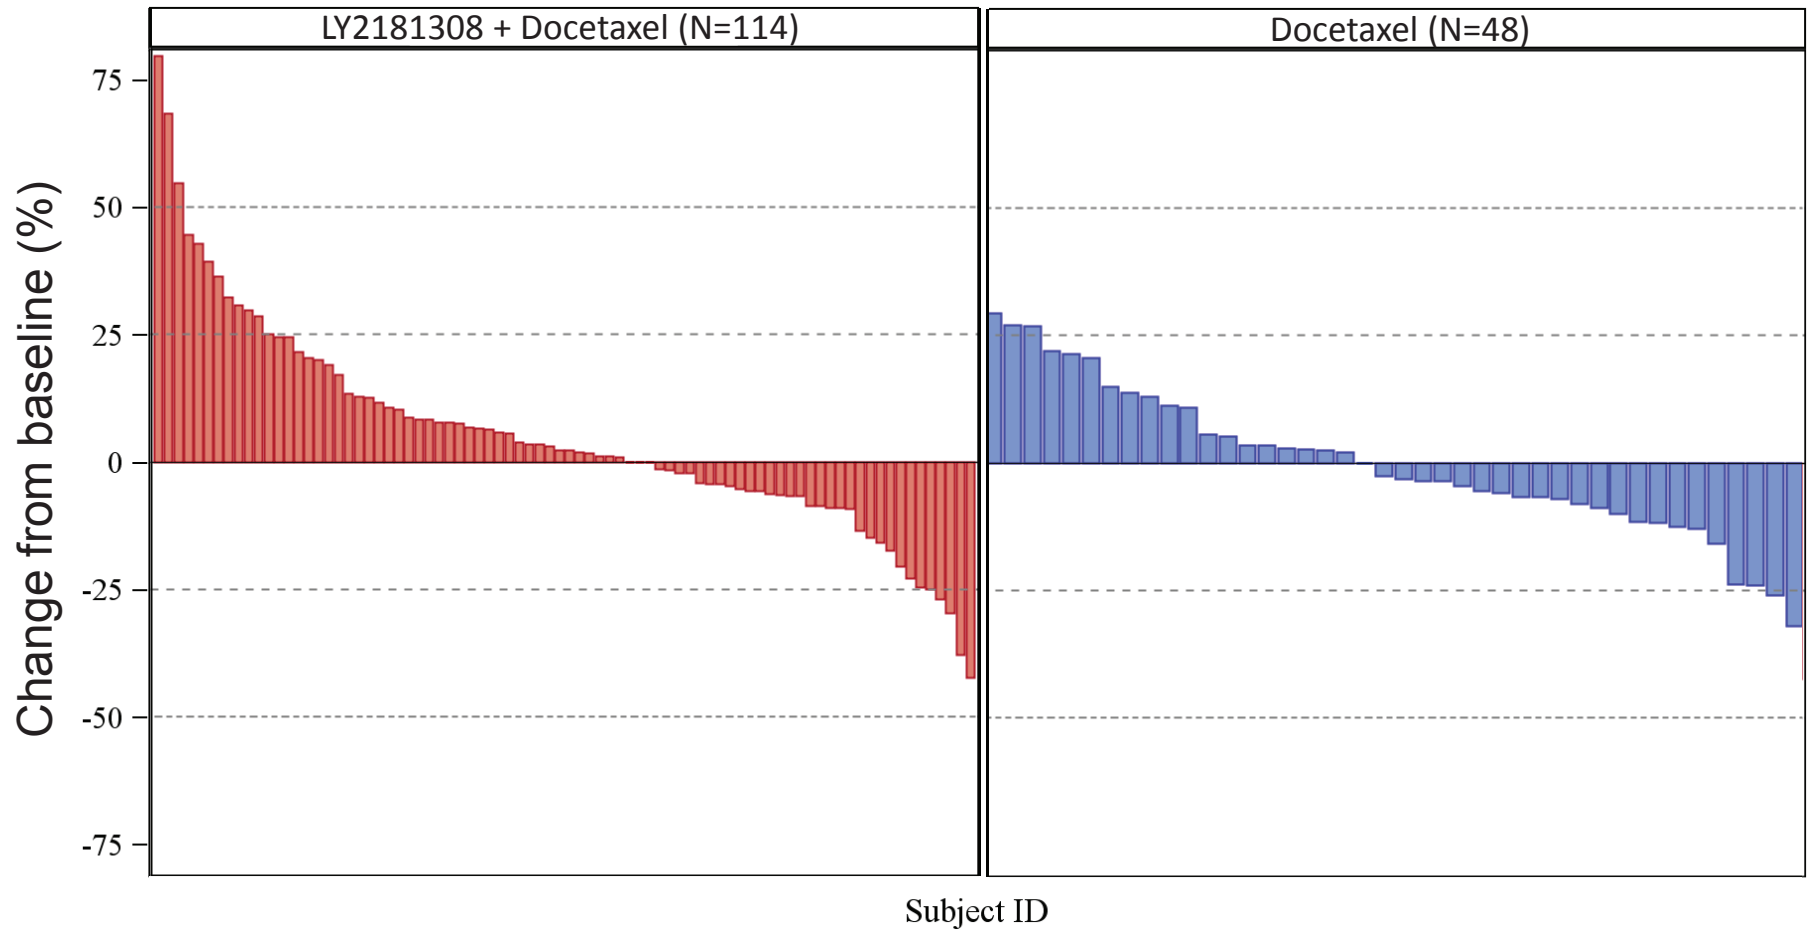

Supplement: NIHMS652994-supplement-Sup4.pdf [file NIHMS652994-supplement-Sup4.pdf]

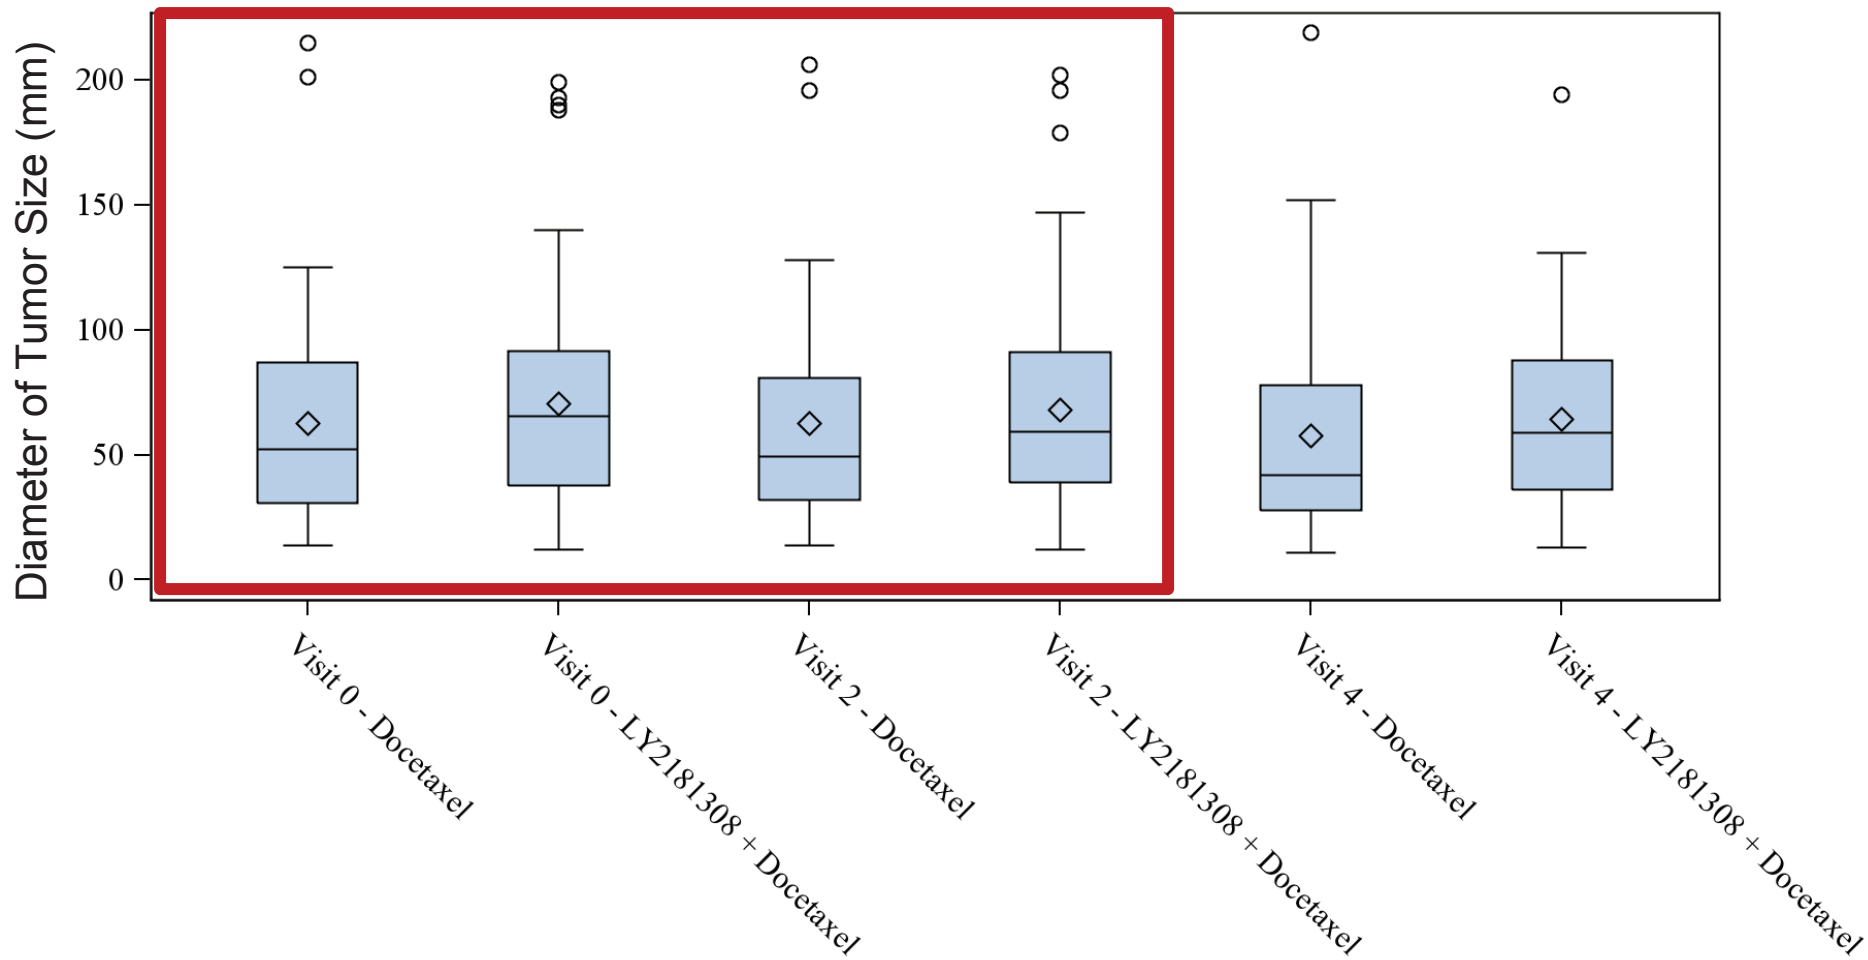

Supplement: NIHMS652994-supplement-Sup5.pdf [file NIHMS652994-supplement-Sup5.pdf]

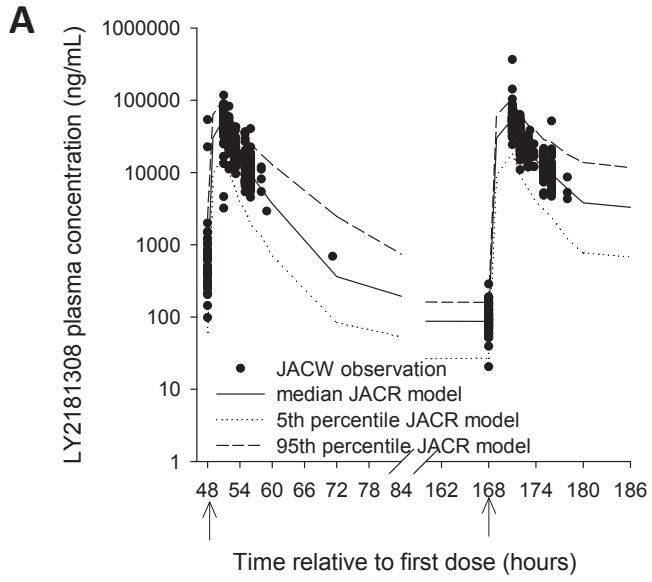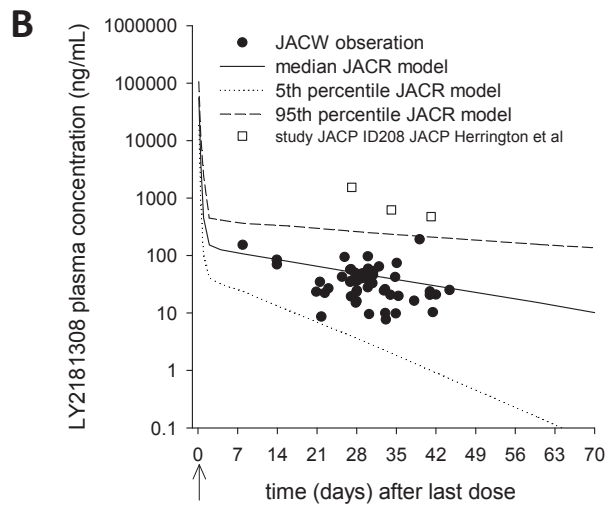

Supplement: NIHMS652994-supplement-Sup6.pdf [file NIHMS652994-supplement-Sup6.pdf]

**A**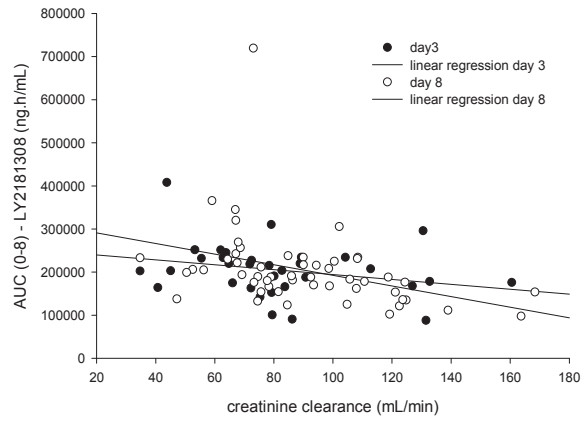**B**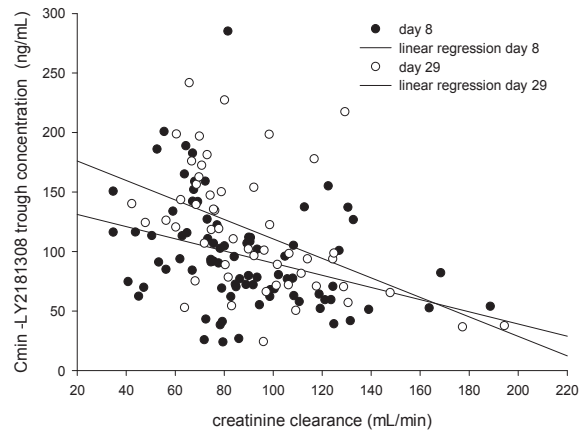

Supplement: NIHMS652994-supplement-Sup7.pdf [file NIHMS652994-supplement-Sup7.pdf]

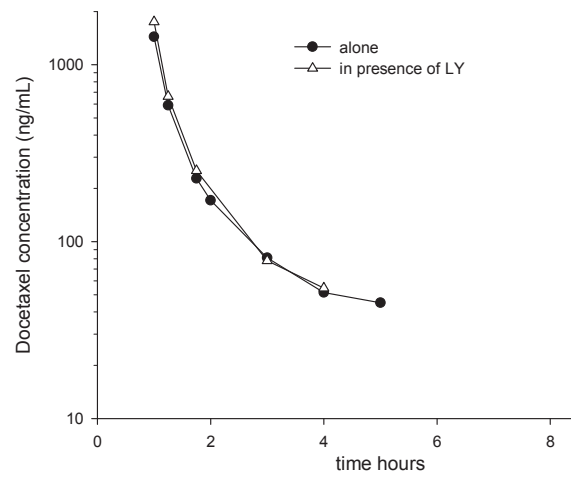

Supplement: NIHMS652994-supplement-Sup8.pdf [file NIHMS652994-supplement-Sup8.pdf]
